# Supplementary material for: Dandelion Extract Alleviated Lipopolysaccharide-Induced Oxidative Stress through the Nrf2 Pathway in Bovine Mammary Epithelial Cells
Source: PubMed Central journal article supplement (PMC7472369; doi:10.3390/toxins12080496), 2020-08-01
Supplement: toxins-12-00496-s001.pdf [file toxins-12-00496-s001.pdf]

# Supplementary Materials: Dandelion Extract Alleviated Lipopolysaccharide-Induced Oxidative Stress through the Nrf2 Pathway in Bovine Mammary Epithelial Cells

Yawang Sun, Yongjiang Wu, Zili Wang, Juncai Chen, You Yang and Guozhong Dong

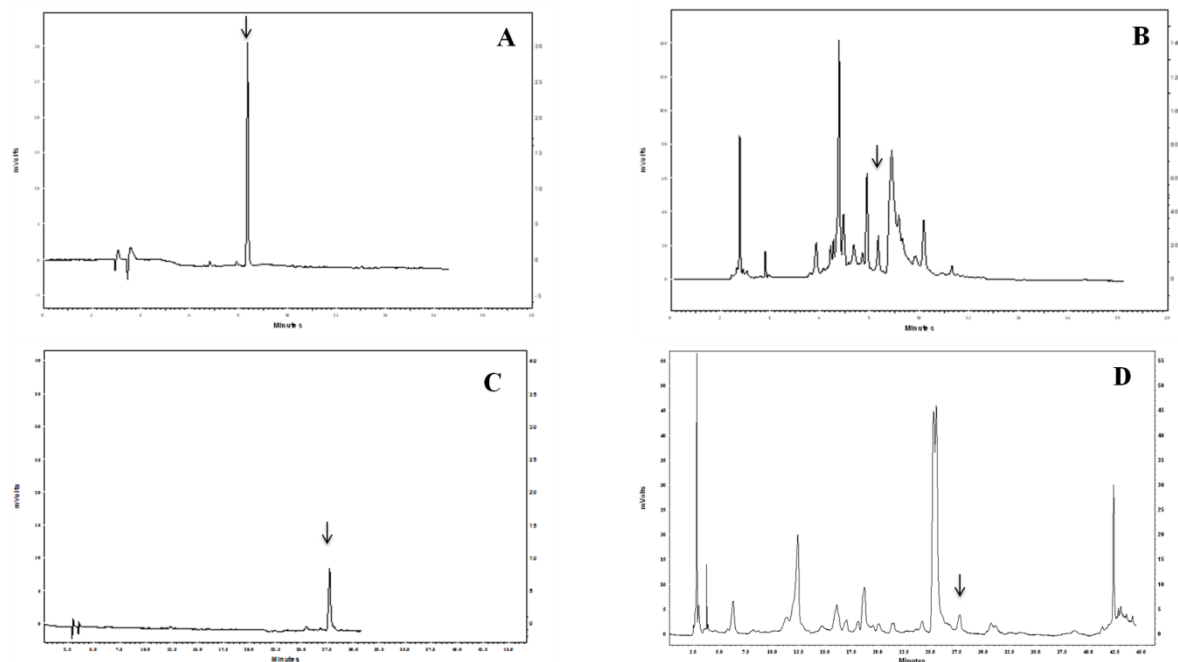

**Figure S1.** The high performance liquid chromatography (HPLC) chromatograms for measuring the contents of luteolin-7-O-glucoside and quercetin-7-O-glucoside in dandelion aqueous extract (DAE). (A) Standard luteolin-7-O-glucoside; (B) Luteolin-7-O-glucoside in DAE; (C) Standard quercetin-7-O-glucoside; (D) Quercetin-7-O-glucoside in DAE.
